# Supplementary material for: Digital Quantification of Intratumoral CD8+ T-Cells Predicts Relapse and Unfavorable Outcome in Uveal Melanoma
Source: MDPI journal article supplement (doi:10.3390/cancers14235959), 2022-12-02
Supplement: s1 [file s1]

**Table S1.** Clinicopathological Features of The Study Cohort.

| Case No | Age (years) | Gender | Tumor localization              | Type of Surgery   | Largest tumor diameter (mm) | TNM (VIII ed.) | Stage at diagnosis |
|---------|-------------|--------|---------------------------------|-------------------|-----------------------------|----------------|--------------------|
| 1       | 46          | Male   | Choroid (ciliary body invasion) | Left Enucleation  | 16                          | T4dN0M0        | IIIC               |
| 2       | 81          | Female | Choroid (ciliary body invasion) | Right Enucleation | 23                          | T4bN0M0        | IIIB               |
| 3       | 73          | Male   | Choroid                         | Right Enucleation | 20                          | T4aN0M0        | IIIA               |
| 4       | 55          | Male   | Ciliary body                    | Right Enucleation | 12,3                        | T3bN0M0        | IIIA               |
| 5       | 55          | Male   | Choroid                         | Left Enucleation  | 20                          | T4dN0M0        | IIIC               |
| 6       | 47          | Female | Choroid                         | Left Enucleation  | 15                          | T3aN0M0        | IIB                |
| 7       | 62          | Female | Choroid (ciliary body invasion) | Left Enucleation  | 20                          | T4bN0M0        | IIIB               |
| 8       | 44          | Male   | Choroid                         | Left Enucleation  | 16                          | T4aN0M0        | IIIA               |
| 9       | 71          | Male   | Choroid                         | Left Enucleation  | 12                          | T3aN0M0        | IIB                |
| 10      | 73          | Male   | Ciliary body (choroid invasion) | Left Enucleation  | 20                          | T4bN0M0        | IIIB               |
| 11      | 78          | Male   | Choroid (ciliary body invasion) | Left Enucleation  | 23                          | T4bN0M0        | IIIB               |
| 12      | 48          | Male   | Iris (ciliary body invasion)    | Right Enucleation | 1,5                         | T3aN0M0        | IIB                |
| 13      | 74          | Male   | Choroid                         | Right Enucleation | 18                          | T2aN0M0        | IIA                |
| 14      | 27          | Female | Choroid                         | Right Enucleation | 14                          | T3aN0M0        | IIB                |
| 15      | 20          | Male   | Choroid                         | Right Enucleation | 21                          | T4aN0M0        | IIIA               |
| 16      | 61          | Male   | Choroid (ciliary body invasion) | Right Enucleation | 18                          | T4bN0M0        | IIIB               |
| 17      | 61          | Male   | Choroid                         | Left Enucleation  | 10                          | T3aN0M0        | IIB                |
| 18      | 64          | Male   | Choroid                         | Left Enucleation  | 17                          | T3aN0M0        | IIB                |
| 19      | 77          | Female | Choroid (ciliary body invasion) | Left Enucleation  | 15                          | T3bN0M0        | IIIA               |
| 20      | 69          | Male   | Ciliary body (choroid invasion) | Left Enucleation  | 16                          | T4bN0M0        | IIIB               |
| 21      | 69          | Female | Choroid (ciliary body invasion) | Left Enucleation  | 14                          | T4bN0M0        | IIIB               |
| 22      | 63          | Female | Choroid                         | Right Enucleation | 20                          | T4aN0M0        | IIIA               |
| 23      | 55          | Male   | Choroid                         | Right Enucleation | 24                          | T4aN0M0        | IIIA               |
| 24      | 40          | Male   | Choroid                         | Right Enucleation | 12                          | T3aN0M0        | IIB                |
| 25      | 64          | Male   | Ciliary body                    | Right Enucleation | 10                          | T2bN0M0        | IIB                |
| 26*     | 69          | Female | Choroid                         | Right Enucleation | 16                          | T3aN0M0        | IIB                |
| 27      | 47          | Male   | Choroid                         | Left Enucleation  | 17                          | T3aN0M0        | IIB                |
| 28      | 56          | Male   | Choroid                         | Right Enucleation | 19                          | T4bN0M0        | IIIB               |
| 29      | 50          | Female | Choroid                         | Left Enucleation  | 13                          | T3aN0M0        | IIB                |
| 30      | 30          | Female | Choroid                         | Left Enucleation  | 18                          | T3aN0M0        | IIB                |
| 31      | 76          | Male   | Choroid                         | Right Enucleation | 21                          | T3aN0M0        | IIB                |
| 32      | 46          | Female | Choroid+Ciliary body            | Right Enucleation | 16                          | T4bN0M0        | IIIB               |
| 33      | 36          | Male   | Choroid                         | Left Enucleation  | 9                           | T3aN0M0        | IIB                |
| 34*     | 50          | Male   | Choroid                         | Right Enucleation | 14                          | T4aN0M0        | IIIA               |
| 35      | 53          | Male   | Choroid                         | Right Enucleation | 13                          | T3aN0M0        | IIB                |
| 36*     | 69          | Male   | Choroid                         | Left Enucleation  | 18                          | T3aN0M0        | IIB                |

|     |    |        |                                 |                   |     |         |      |
|-----|----|--------|---------------------------------|-------------------|-----|---------|------|
| 37  | 68 | Male   | Choroid                         | Right Enucleation | 18  | T4cN0M0 | IIIB |
| 38* | 80 | Male   | Choroid                         | Right Enucleation | 19  | T4aN0M0 | IIIA |
| 39  | 46 | Female | Choroid                         | Left Enucleation  | 12  | T3aN0M0 | IIB  |
| 40  | 47 | Female | Choroid                         | Right Enucleation | 15  | T4aN0M0 | IIIA |
| 41  | 76 | Female | Choroid                         | Left Enucleation  | 19  | T3aN0M0 | IIB  |
| 42  | 62 | Female | Choroid                         | Right Enucleation | 14  | T3aN0M0 | IIB  |
| 43* | 66 | Female | Choroid                         | Right Enucleation | 10  | T3aN0M0 | IIB  |
| 44* | 56 | Male   | Choroid                         | Left Enucleation  | 12  | T2aN0M0 | IIA  |
| 45  | 41 | Female | Choroid                         | Left Enucleation  | 11  | T3aN0M0 | IIB  |
| 46* | 46 | Female | Choroid                         | ? Enucleation     | 10  | T2aN0M0 | IIA  |
| 47  | 74 | Female | Choroid (ciliary body invasion) | ? Enucleation     | 18  | T3bN0M0 | IIIA |
| 48  | 74 | Male   | Choroid                         | Left Exenteration | 60  | T4eN0M0 | IIIC |
| 49  | 42 | Male   | Choroid                         | Left Enucleation  | 17  | T3aN0M0 | IIB  |
| 50  | 60 | Male   | Choroid                         | Left Enucleation  | 21  | T4bN0M0 | IIIB |
| 51  | 45 | Male   | Choroid                         | Left Enucleation  | 17  | T3aN0M0 | IIB  |
| 52  | 71 | Male   | Choroid                         | Right Enucleation | 12  | T3aN0M0 | IIB  |
| 53  | 72 | Male   | Choroid                         | Right Enucleation | 10  | T3aN0M0 | IIB  |
| 54  | 68 | Male   | Choroid                         | Right Enucleation | 17  | T3aN0M0 | IIB  |
| 55* | 66 | Female | Choroid                         | Left Enucleation  | 16  | T3aN0M0 | IIB  |
| 56* | 89 | Female | Choroid                         | Right Enucleation | 13  | T3aN0M0 | IIB  |
| 57  | 55 | Female | Choroid                         | Left Enucleation  | 15  | T3aN0M0 | IIB  |
| 58  | 65 | Male   | Choroid                         | Right Enucleation | 15  | T3aN0M0 | IIB  |
| 59  | 78 | Female | Choroid                         | Right Enucleation | 19  | T4aN0M0 | IIIA |
| 60* | 74 | Female | Choroid                         | ? Enucleation     | 18  | T3aN0M0 | IIB  |
| 61* | 54 | Male   | Choroid                         | Left Enucleation  | 20  | T3aN0M0 | IIB  |
| 62  | 74 | Female | Choroid                         | Left Enucleation  | 25  | T4aN0M0 | IIIA |
| 63* | 81 | Female | Choroid                         | Left Enucleation  | 12  | T3aN0M0 | IIB  |
| 64* | 68 | Female | Choroid (ciliary body invasion) | Left Enucleation  | 20  | T4dN0M0 | IIIC |
| 65  | 95 | Female | Choroid                         | Left Enucleation  | 12  | T3aN0M0 | IIB  |
| 66  | 71 | Female | Iris                            | Right Enucleation | 9   | T3aN0M0 | IIB  |
| 67  | 70 | Female | Choroid                         | Right Enucleation | 15  | T3aN0M0 | IIB  |
| 68  | 49 | Female | Choroid                         | Left Enucleation  | 17  | T3aN0M0 | IIB  |
| 69  | 51 | Male   | Choroid                         | Right Enucleation | 14  | T2aN0M0 | IIA  |
| 70  | 48 | Male   | Choroid                         | Right Enucleation | 17  | T4aN0M0 | IIIA |
| 71  | 43 | Female | Choroid                         | Left Enucleation  | 22  | T4aN0M0 | IIIA |
| 72* | 73 | Female | Choroid                         | Left Enucleation  | 14  | T2aN0M0 | IIA  |
| 73* | 66 | Male   | Choroid                         | Right Enucleation | 17  | T3aN0M0 | IIB  |
| 74* | 53 | Male   | Choroid                         | Left Enucleation  | 17  | T3aN0M0 | IIB  |
| 75  | 65 | Female | Choroid                         | Right Enucleation | 22  | T4aN0M0 | IIIA |
| 76  | 80 | Female | Choroid                         | Left Enucleation  | 9,5 | T3aN0M0 | IIB  |
| 77* | 70 | Male   | Choroid                         | Left Enucleation  | 7   | T1aN0M0 | I    |
| 78  | 78 | Female | Choroid                         | Right Enucleation | 19  | T4aN0M0 | IIIA |
| 79* | 67 | Female | Choroid                         | Left Enucleation  | 15  | T3aN0M0 | IIB  |
| 80  | 34 | Female | Choroid                         | Left Enucleation  | 23  | T4aN0M0 | IIIA |
| 81  | 65 | Male   | Choroid                         | Right Enucleation | 18  | T4aN0M0 | IIIA |
| 82* | 86 | Female | Choroid                         | Left Enucleation  | 15  | T3aN0M0 | IIB  |
| 83  | 76 | Female | Choroid                         | Right Enucleation | 20  | T4aN0M0 | IIIA |
| 84  | 28 | Female | Choroid                         | Right Enucleation | 12  | T3aN0M0 | IIB  |

|      |    |        |                                 |                   |       |         |      |
|------|----|--------|---------------------------------|-------------------|-------|---------|------|
| 85*  | 27 | Male   | Ciliary body (iris invasion)    | Left Enucleation  | 10    | T1aN0M0 | I    |
| 86*  | 62 | Female | Choroid                         | Right Enucleation | 12    | T2aN0M0 | IIA  |
| 87*  | 59 | Female | Choroid                         | Right Enucleation | 14    | T3aN0M0 | IIB  |
| 88*  | 73 | Male   | Choroid                         | Right Enucleation | 15    | T3aN0M0 | IIB  |
| 89   | 90 | Female | Choroid                         | Left Enucleation  | 18    | T4aN0M0 | IIIA |
| 90   | 61 | Female | Choroid                         | Left Enucleation  | 11,25 | T4aN0M0 | IIIA |
| 91*  | 62 | Female | Choroid                         | Left Enucleation  | 14    | T3aN0M0 | IIB  |
| 92   | 39 | Male   | Choroid                         | Left Enucleation  | 22    | T4eN0M0 | IIIC |
| 93*  | 78 | Female | Choroid+Ciliary body            | Left Enucleation  | 16    | T3bN0M0 | IIIA |
| 94*  | 60 | Male   | Choroid                         | Right Enucleation | 17    | T3aN0M0 | IIB  |
| 95*  | 36 | Female | Choroid                         | Left Enucleation  | 22    | T4aN0M0 | IIIA |
| 96   | 82 | Female | Choroid                         | Right Enucleation | 20    | T4cN0M0 | IIIB |
| 97*  | 58 | Male   | Choroid                         | Left Enucleation  | 20    | T4eNxMx | IIIC |
| 98   | 61 | Male   | Choroid                         | Left Enucleation  | 18    | T3bN0M0 | IIIA |
| 99   | 31 | Female | Ciliary body (choroid invasion) | Right Enucleation | 18    | T3bN0M0 | IIIA |
| 100  | 39 | Female | Choroid                         | Right Enucleation | 18    | T3aN0M0 | IIB  |
| 101* | 61 | Male   | Choroid (ciliary body invasion) | Right Enucleation | 24    | T4eN0M0 | IIIC |

\*Those cases are excluded from the survival analyses for being lost to follow-up.

**Table S2.** Univariable analysis on relapse free survival (RFS) and overall survival (OS).

|                                                                 | Relapse free survival          | Overall survival                   |
|-----------------------------------------------------------------|--------------------------------|------------------------------------|
|                                                                 | HR (95% CI), p-value           | HR (95% CI), p-value               |
| <b>CD4+ score</b> (1+/2+ vs 0)                                  | 1.20 (0.65-2.22), 0.561        | 1.47 (0.75-2.88), 0.260            |
| <b>CD4+ density</b> (10 cell/mm <sup>2</sup> increase)          | 1.00 (0.99-1.02), 0.699        | 1.01 (0.99-1.02), 0.450            |
| <b>CD4+ density (cell/mm<sup>2</sup>)</b> (>39.4 vs ≤ 39.4)     | 0.89 (0.48-1.65), 0.721        | 1.05 (0.54-2.04), 0.885            |
| <b>CD8+ score</b> (ref. 0)                                      | 0.323                          | 0.142                              |
| 1+                                                              | 1.55 (0.66-3.62), 0.311        | 1.26 (0.50-3.21), 0.621            |
| 2+ 3+                                                           | 2.07 (0.80-5.36), 0.133        | 2.40 (0.88-6.52), 0.086            |
| <b>CD8+ density</b> (10 cell/mm <sup>2</sup> increase)          | 1.00 (0.99-1.02), 0.642        | 1.01 (0.99-1.02), 0.251            |
| <b>CD8+ density (cell/mm<sup>2</sup>)</b> (>13.3 vs ≤ 13.3)     | 1.61 (0.85-3.04), 0.144        | 2.48 (1.21-5.09), <b>0.013</b>     |
| <b>CD68+ score</b> (ref. 0)                                     | 0.981                          | 0.704                              |
| 1+                                                              | 1.09 (0.46-2.60), 0.846        | 1.10 (0.40-3.00), 0.856            |
| 2+ 3+                                                           | 1.06 (0.43-2.62), 0.896        | 1.42 (0.51-3.96), 0.498            |
| <b>CD68+ density</b> (10 cell/mm <sup>2</sup> increase)         | 0.99 (0.97-1.02), 0.621        | 1.00 (0.98-1.02), 0.944            |
| <b>CD68+ density (cell/mm<sup>2</sup>)</b> (>46.1 vs ≤ 46.1)    | 0.92 (0.50-1.71), 0.796        | 0.88 (0.45-1.71), 0.706            |
| <b>CD163+ score</b> (ref. 0/1)                                  | 0.539                          | 0.252                              |
| 2+                                                              | 1.45 (0.57-3.65), 0.435        | 2.73 (0.80-9.32), 0.109            |
| 3+                                                              | 1.70 (0.67-4.35), 0.267        | 2.72 (0.79-9.44), 0.114            |
| <b>CD163+ density</b> (10 cell/mm <sup>2</sup> increase)        | 1.00 (0.99-1.01), 0.411        | 1.00 (0.99-1.01), 0.494            |
| <b>CD163+ density (cell/mm<sup>2</sup>)</b> (>260.6 vs ≤ 260.6) | 1.45 (0.78-2.68), 0.240        | 1.57 (0.80-3.07), 0.189            |
| <b>Age</b> (1 years increase)                                   | 1.03 (1.01-1.06), <b>0.003</b> | 1.05 (1.02-1.07), <b>&lt;0.001</b> |
| <b>Sex</b> (Male vs Female)                                     | 1.11 (0.60-2.05), 0.745        | 1.15 (0.59-2.24), 0.679            |
| <b>Stage at diagnosis</b> (III vs II)                           | 2.47 (1.29-4.73), <b>0.007</b> | 2.84 (1.36-5.91), <b>0.005</b>     |

Note: Significant p-values in bold.
